# Supplementary material for: High resolution tracking of macrophage cells in deep organs and lymphatics using fluorescent polymer dots
Source: Royal Society of Chemistry journal article supplement (doi:10.1039/c9ra00954j), 2019-01-01
Supplement: c9ra00954j3.pdf [file c9ra00954j3.pdf]

## Supporting Information

### **High resolution tracking macrophage cells in deep organs and lymphatics using fluorescent polymer dots**

*Shiyi Tang<sup>a</sup>, Yixiao Guo<sup>a</sup>, Yidian Yang<sup>ab</sup>, Yao Li<sup>a</sup>, Yanhong Gao<sup>c</sup>, Chunfu Zhang<sup>a</sup>, and Liqin Xiong<sup>\*a</sup>*

*<sup>a</sup> Shanghai Med-X Engineering Center for Medical Equipment and Technology, School of Biomedical Engineering, Shanghai Jiao Tong University, Shanghai 200030, P. R. China. E-mail: [xiongliqin@sjtu.edu.cn](mailto:xiongliqin@sjtu.edu.cn)*

*<sup>b</sup> The Key Laboratory of Resource Chemistry of Ministry of Education, Shanghai Key Laboratory of Rare Earth Functional Materials, and Shanghai Municipal Education Committee Key Laboratory of Molecular Imaging Probes and Sensors, Shanghai Normal University, Shanghai 200234, P. R. China.*

*<sup>c</sup> Department of Geriatrics, Xinhua Hospital of Shanghai Jiao Tong University, School of Medicine, Shanghai 200092, P. R. China.*

---

**Scheme S1.** Structure and synthesis of the polymer dots.

**Table S1.** Fluorescence QY of polymer dots.

**Figure S1.** The Z-average sizes versus pH change of the four MEH-PPV polymer dots.

**Figure S2.** Fluorescence imaging of the major organs, lymph nodes, iBAT, muscle and bone.

**Figure S3.** Fluorescence imaging of Ana-1 incubated with four typical polymer dots.

**Figure S4.** Phagocytosis percentage of four typical polymer dots in Ana-1 cells.

**Figure S5.** *Ex vivo* IVIS imaging of organs and lymph nodes.

**Figure S6.** *Ex vivo* fluorescence imaging of the organs.

**Movie S1.** pCLE video of lungs in living BALB/c mice 20 min after i.v. injection of Ana-1 cells labeled by FA-MEH-PPV-NH<sub>2</sub>.

**Movie S2.** pCLE video of lungs in living BALB/c mice 2 h after i.v. injection of Ana-1 cells labeled by FA-MEH-PPV-NH<sub>2</sub>.



---

| Polymer dots               | MEH-PPV emission | NIR775 emission |
|----------------------------|------------------|-----------------|
| FA-MEH-PPV-COOH            | 0.148            | 0.012           |
| MEH-PPV-COOH               | 0.130            | 0.011           |
| FA-MEH-PPV-NH <sub>2</sub> | 0.134            | 0.011           |
| MEH-PPV-NH <sub>2</sub>    | 0.122            | 0.011           |

---

**Table S1.** Fluorescence QY of polymer dots.

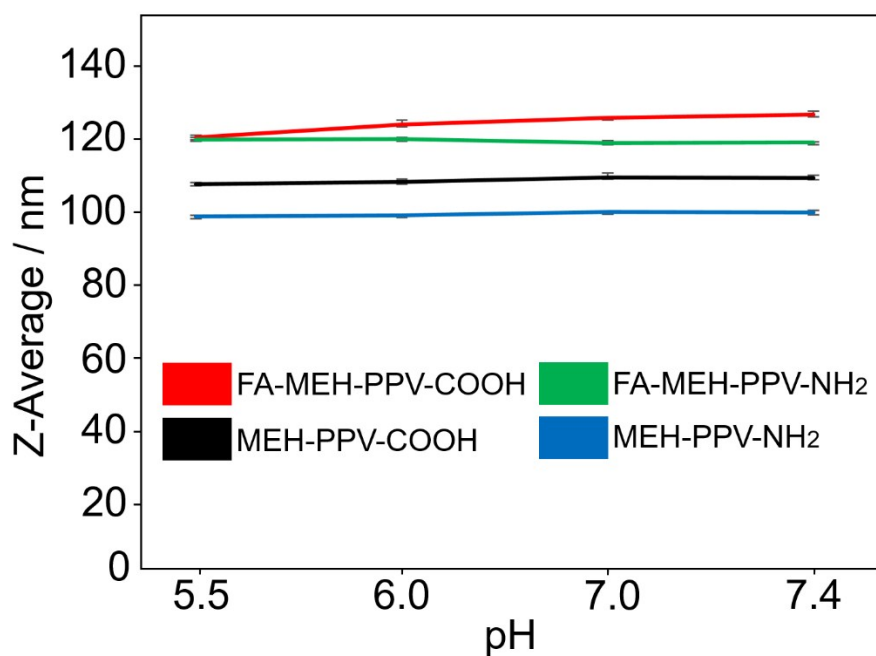

**Figure S1.** The Z-average sizes versus pH change of the four MEH-PPV polymer dots.

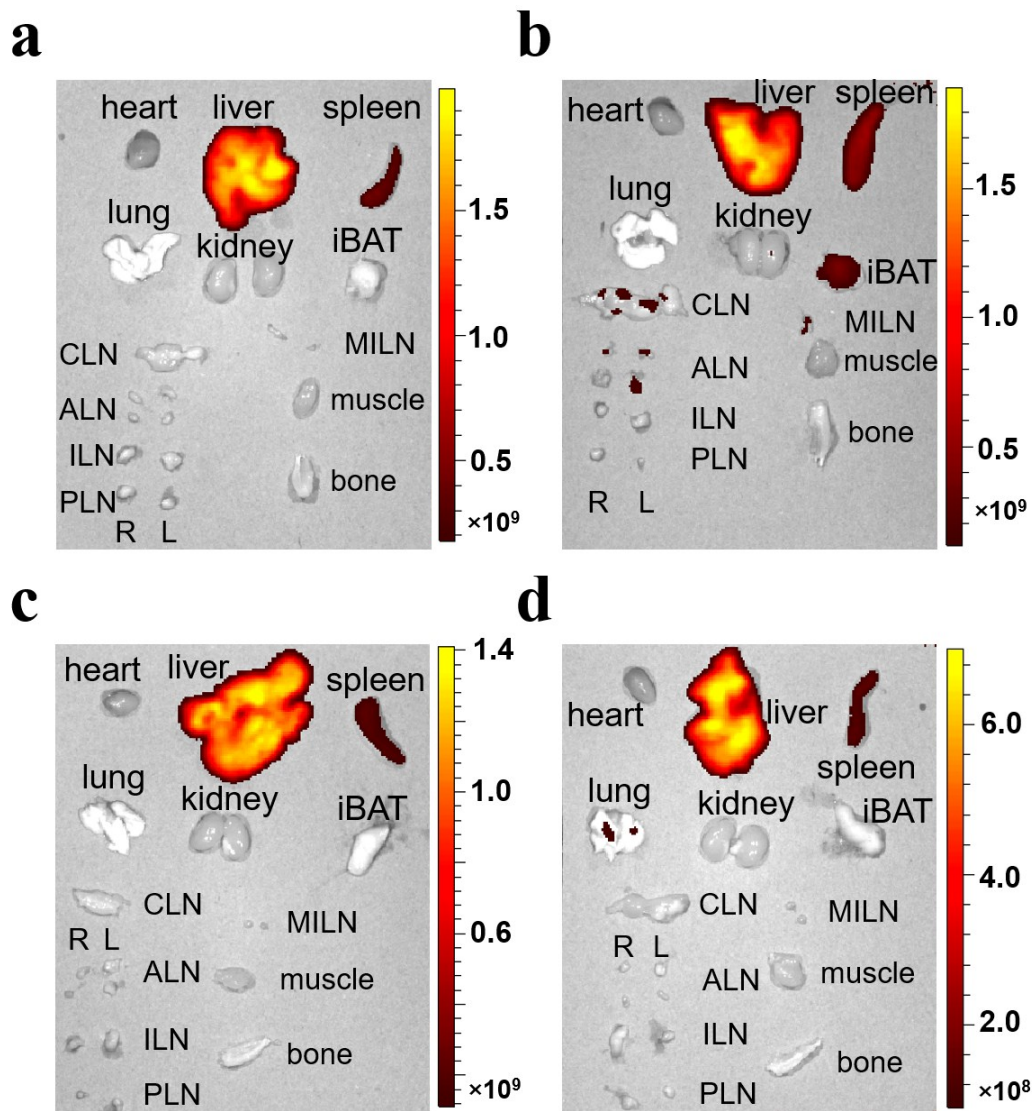

**Figure S2.** Fluorescence imaging of the major organs (heart, liver, spleen, lungs, and kidneys), lymph nodes (cervical, axillary, inguinal, popliteal, and medial iliac lymph nodes), interscapular brown adipose tissue (iBAT), muscle and bone from the hind limb (R: right; L:left) 2 d after intravenously injected by four typical MEH-PPV polymer dots. (a) FA-MEH-PPV-COOH polymer dots (n=3); (b) MEH-PPV-COOH polymer dots (n=3); (c) FA-MEH-PPV-NH<sub>2</sub> polymer dots (n=3); (d) MEH-PPV-NH<sub>2</sub> polymer dots (n=3);

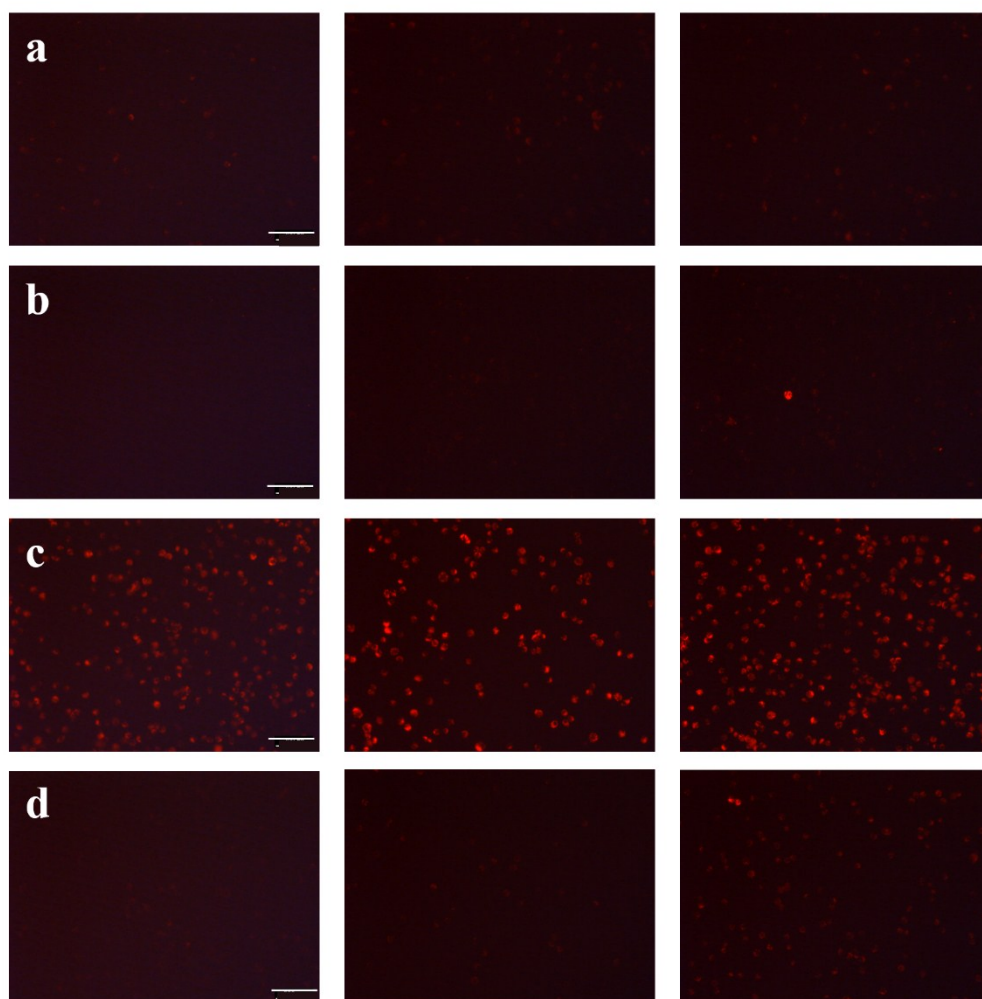

**Figure S3.** Fluorescence imaging of Ana-1 incubated with four indicated MEH-PPV polymer dots (~20  $\mu\text{g}$ ) for 2, 6, 10 h. (a) FA-MEH-PPV-COOH; (b) MEH-PPV-COOH; (c) FA-MEH-PPV-NH<sub>2</sub>; (d) MEH-PPV-NH<sub>2</sub>. Image columns from left to right: (i) 2 h after incubated, (ii) 6 h after incubated, (iii) 10 h after incubated. (Scale bar: 50  $\mu\text{m}$ )

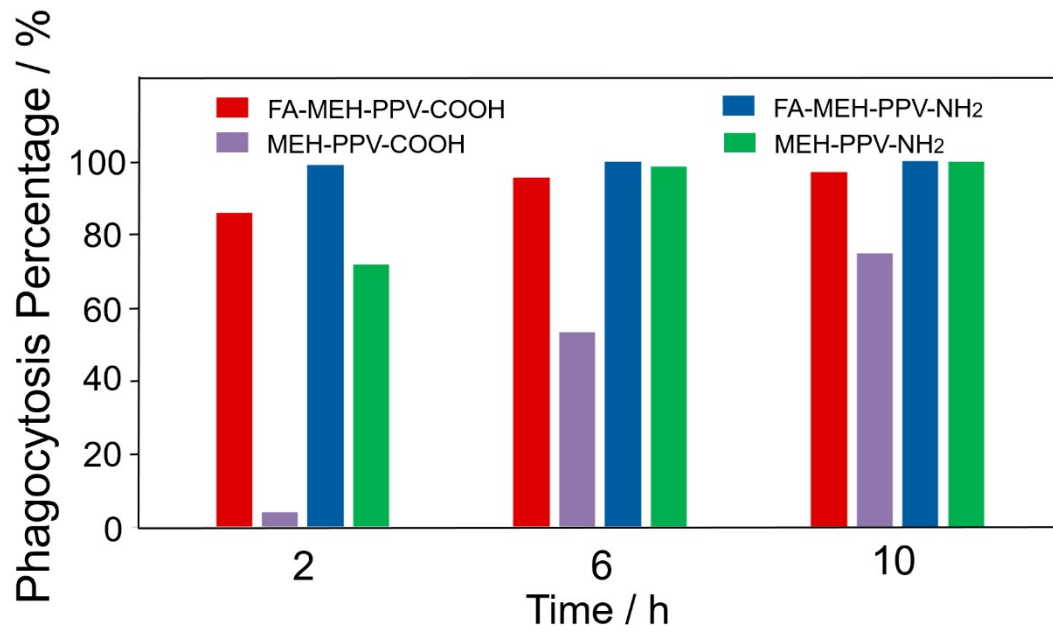

**Figure S4.** Phagocytosis percentage of four typical MEH-PPV polymer dots (~20 $\mu$ g) in Ana-1 cells for 2, 6, 10 h under serum-containing medium.

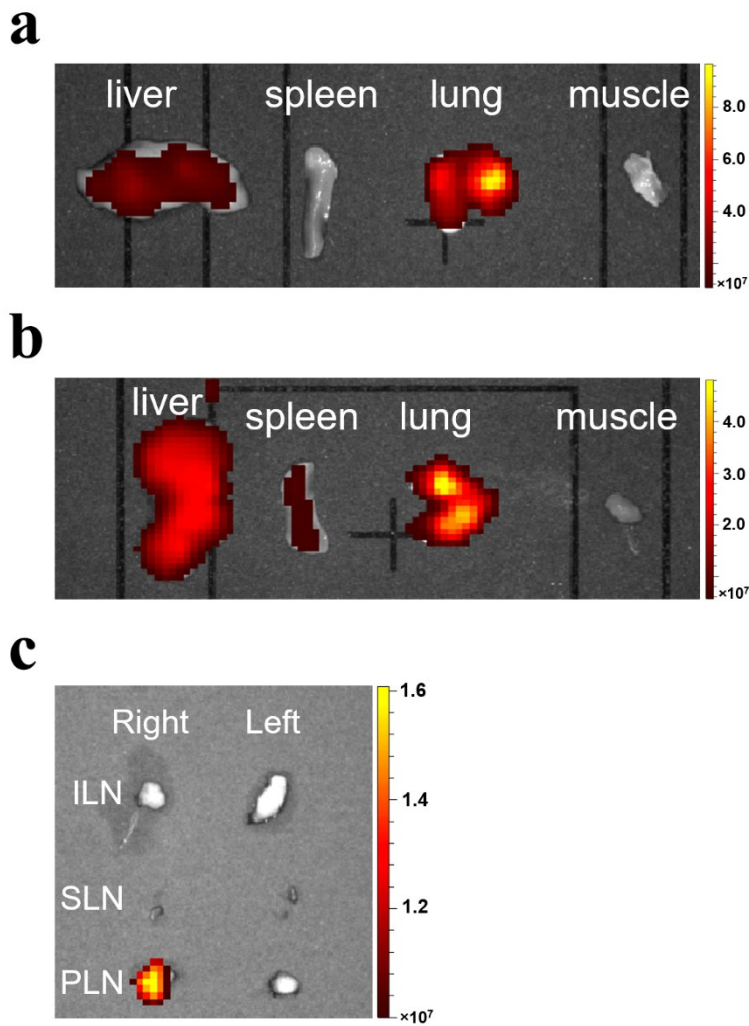

**Figure S5.** *Ex vivo* fluorescence imaging of organs and lymph nodes. (a) Fluorescence imaging of organs (liver, spleen, lung, and muscle) for 20 min after caudal vein injection of Ana-1 cells labeled by FA-MEH-PPV-NH<sub>2</sub> polymer dots; (b) Fluorescence imaging of organs for 2 h after caudal vein injection of Ana-1 cells; (c) Fluorescence imaging of lymph nodes (ILN: inguinal lymph node; SLN: sciatic lymph node; PLN: popliteal lymph node) for 2 d after footpad injection (right) of Ana-1 cells labeled by FA-MEH-PPV-NH<sub>2</sub> polymer dots. (Excitation filter,  $520 \pm 15$  nm; emission filter,  $790 \pm 10$  nm, n=3).



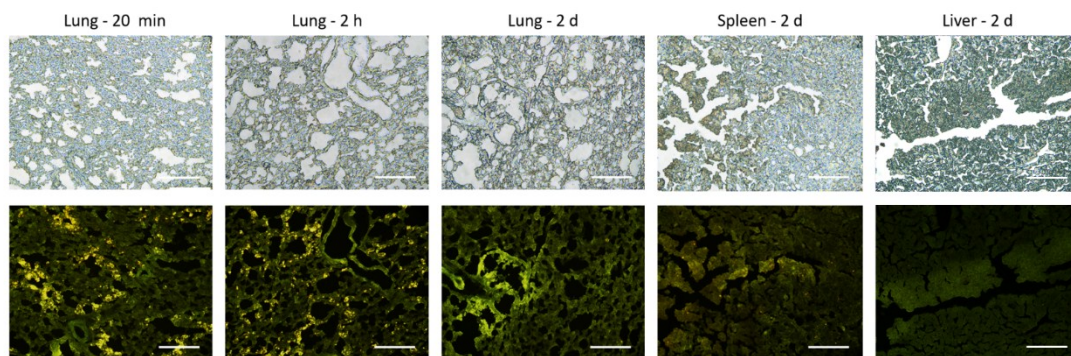

**Figure S6.** *Ex vivo* fluorescence imaging of the organs of blank mice 20 min, 2 h and 2 d after caudal vein injection of Ana-1 cells labeled by FA-MEH-PPV-NH<sub>2</sub> polymer dots. (bar: 200  $\mu$ m)
